# Supplementary material for: A chimeric dengue virus vaccine candidate delivered by high density microarray patches protects against infection in mice
Source: PubMed Central journal article supplement (PMC8105366; doi:10.1038/s41541-021-00328-1), 2021-05-07
Supplement: 41541_2021_328_MOESM1_ESM.pdf [file 41541_2021_328_MOESM1_ESM.pdf]

## **Supplementary Information**

**Supplementary Figure 1.** Percentage weight loss and morbidity scores following virus challenge in dose optimisation study (with Fig. 3)

**Supplementary Figure 2.** IFA analysis by confocal microscopy of BinJ/DENV2-prME and DENV2 infected C6/36 and mammalian cell lines

**Supplementary Figure 3.** Percentage weight loss and morbidity scores following virus challenge in HD-MAP study (with Fig. 6).

**Supplementary Figure 4.** SDS-PAGE (4 – 12%) analysis of gradient purified BinJ/DENV2-prME alongside BSA standards (with Fig. 1).

(a)

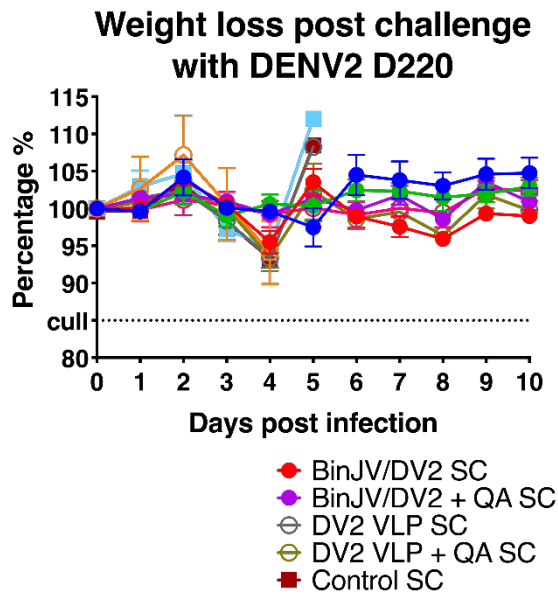

(b)

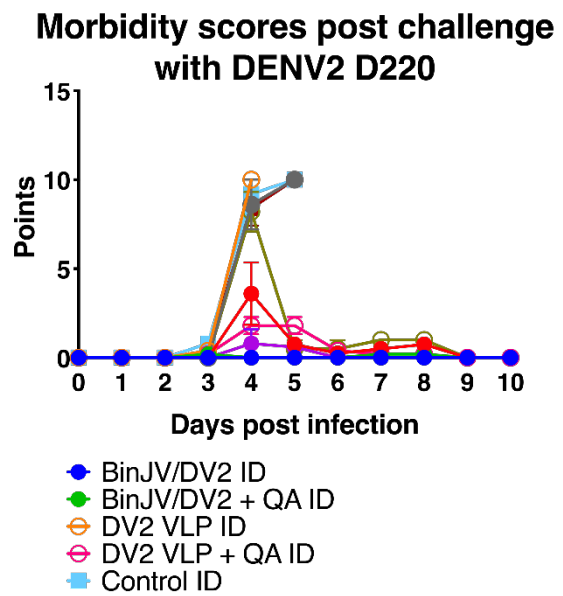

**Supplementary Figure 1.** Percentage weight loss and morbidity scores following virus challenge in dose optimisation study (with Fig. 3). **(a)** Mean percentage weight loss per group ( $n=5$ ) across 10 days post DENV2 D220 virus challenge. Dotted line represents 15% weight loss. **(b)** Mean morbidity scores per group ( $n=5$ ) across 10 days post DENV2 D220 virus challenge.

(a) C6/36

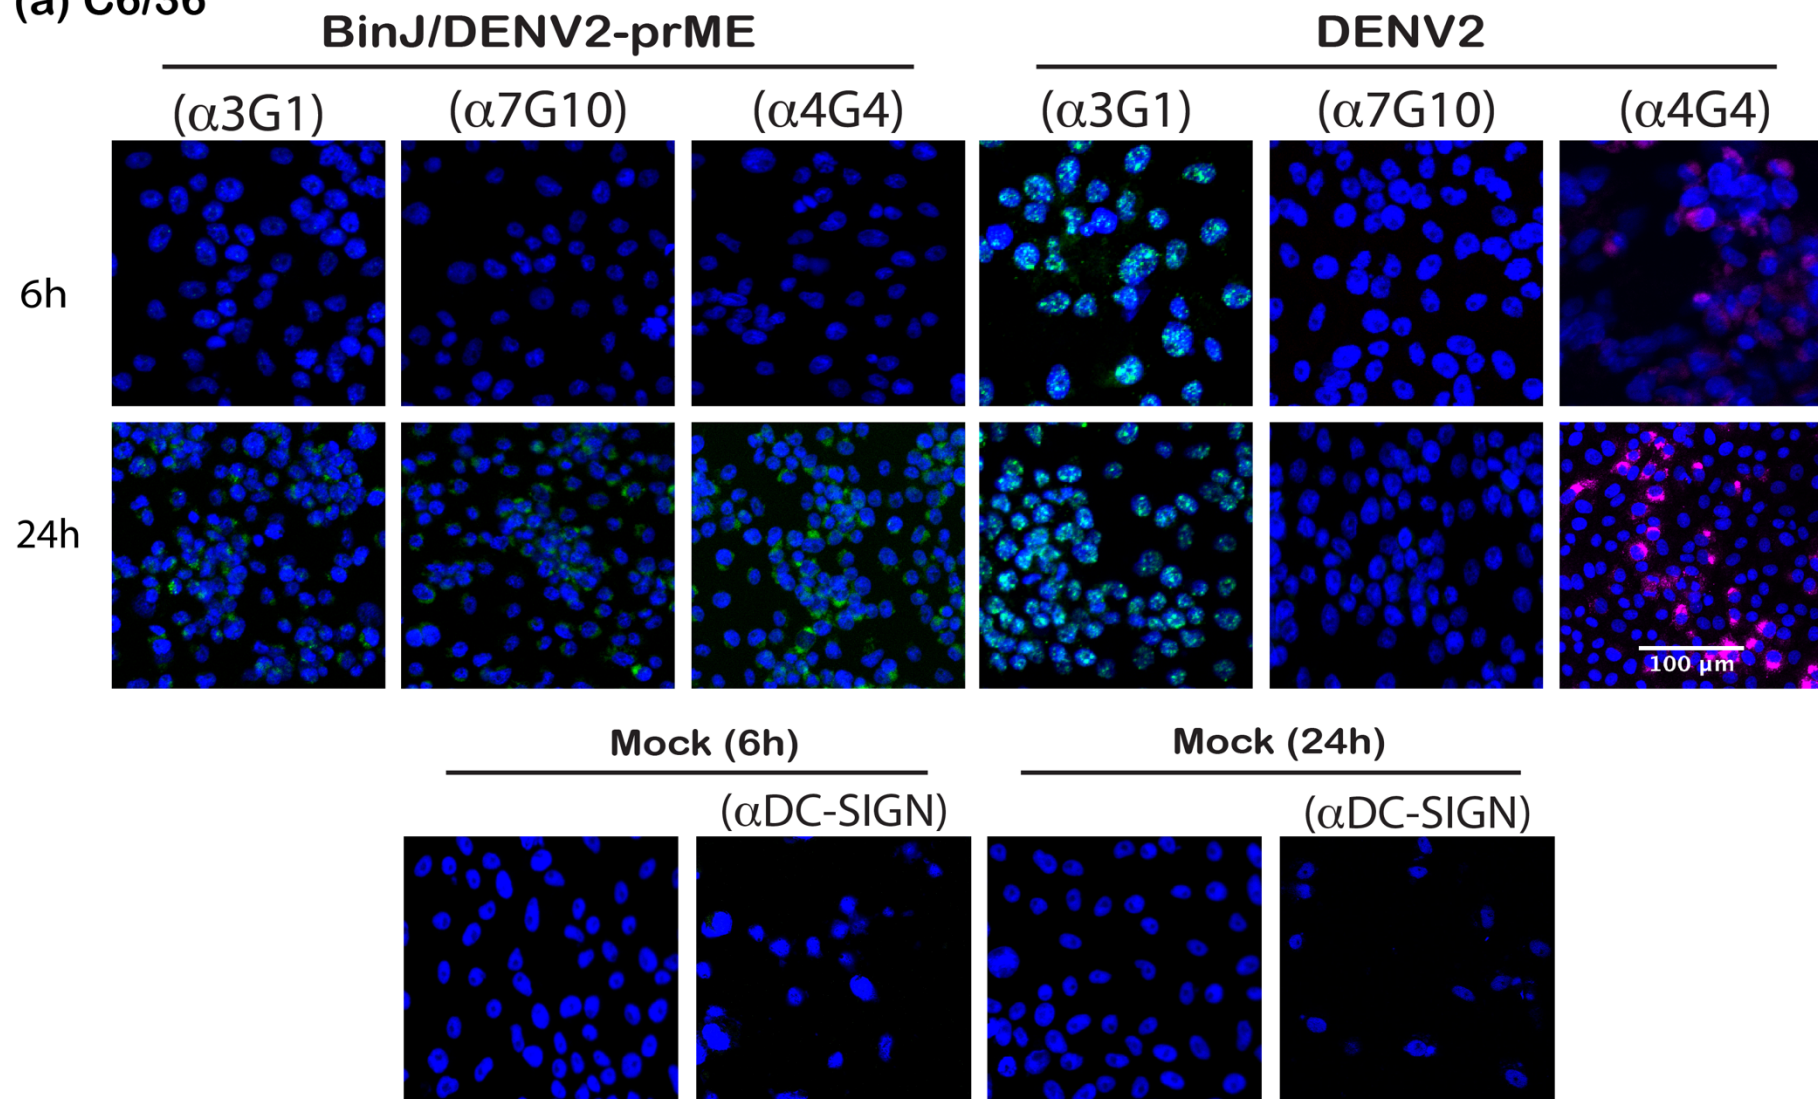

$\alpha 3G1$ : dsRNA;  $\alpha 7G10$ : BinJV specific NS1;  $\alpha 4G4$ : pan-flavivirus NS1

(b) K562

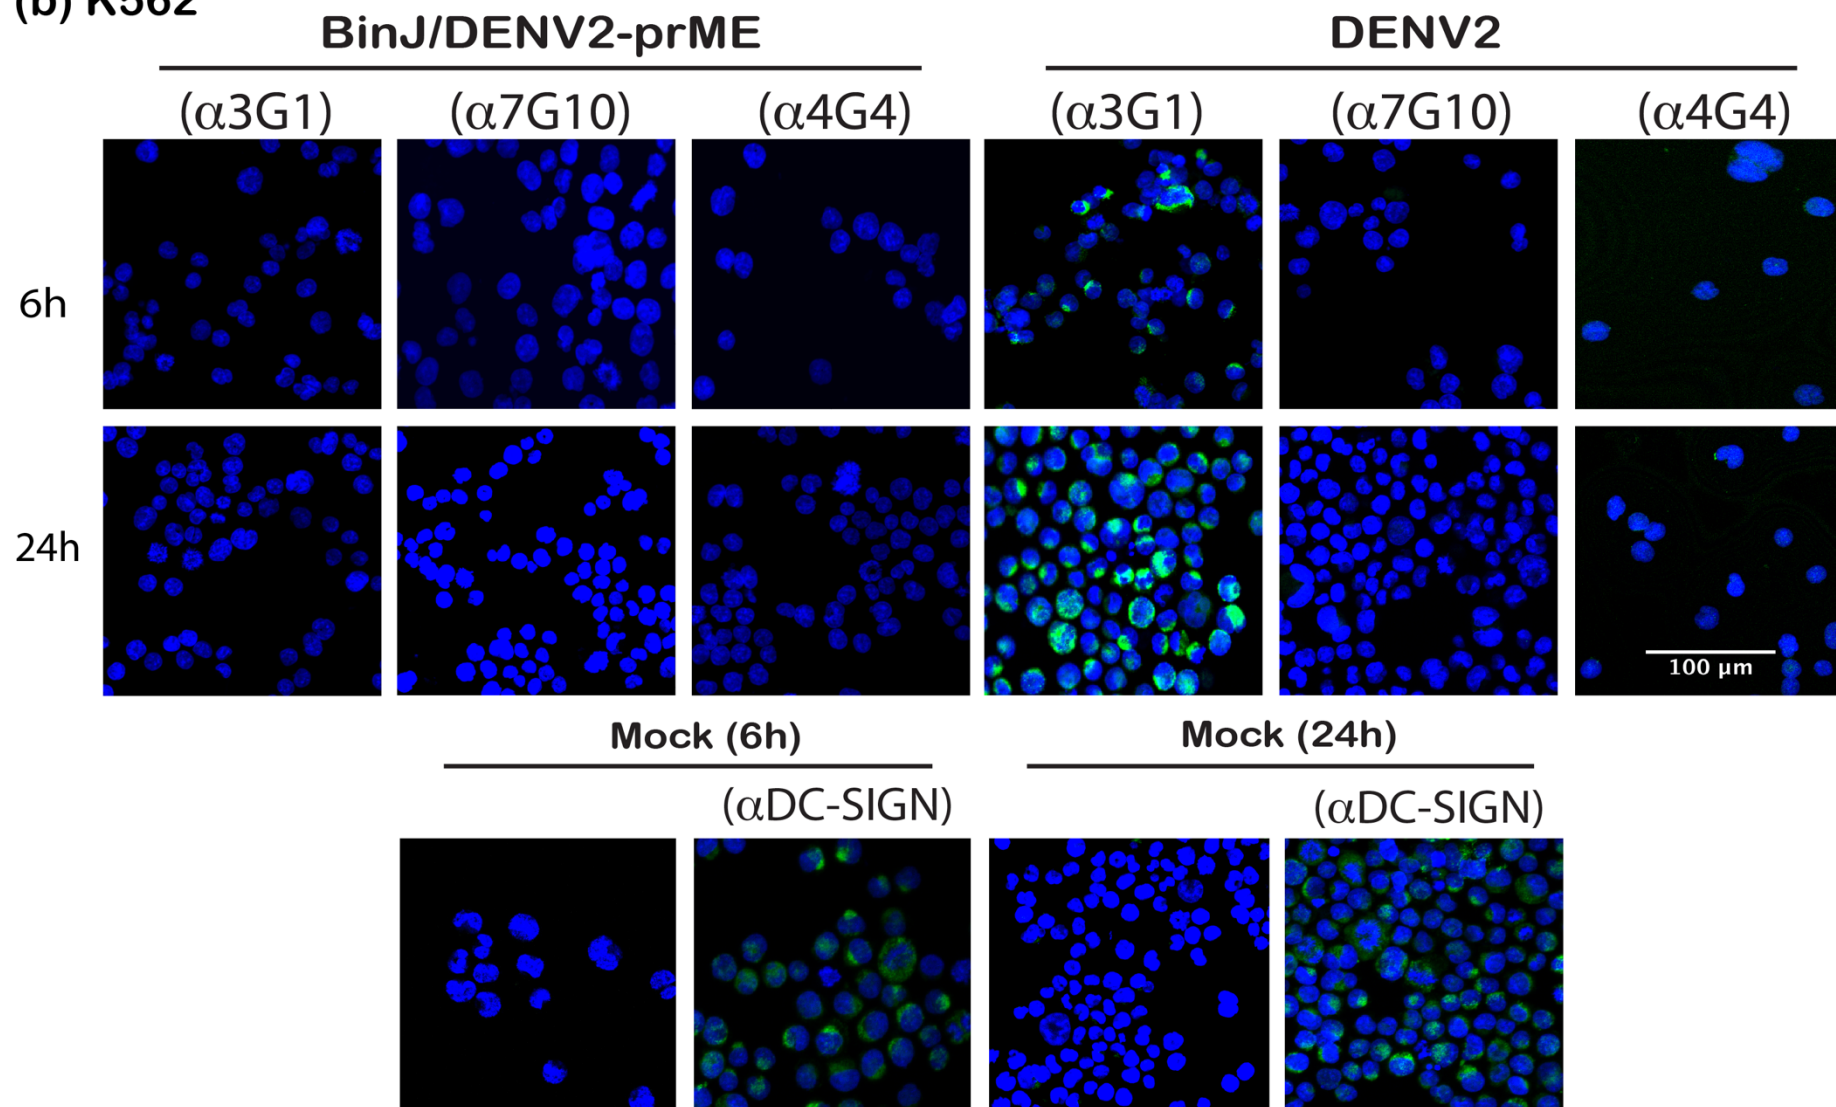

$\alpha 3G1$ : dsRNA;  $\alpha 7G10$ : BinJV specific NS1;  $\alpha 4G4$ : pan-flavivirus NS1

(c) A549

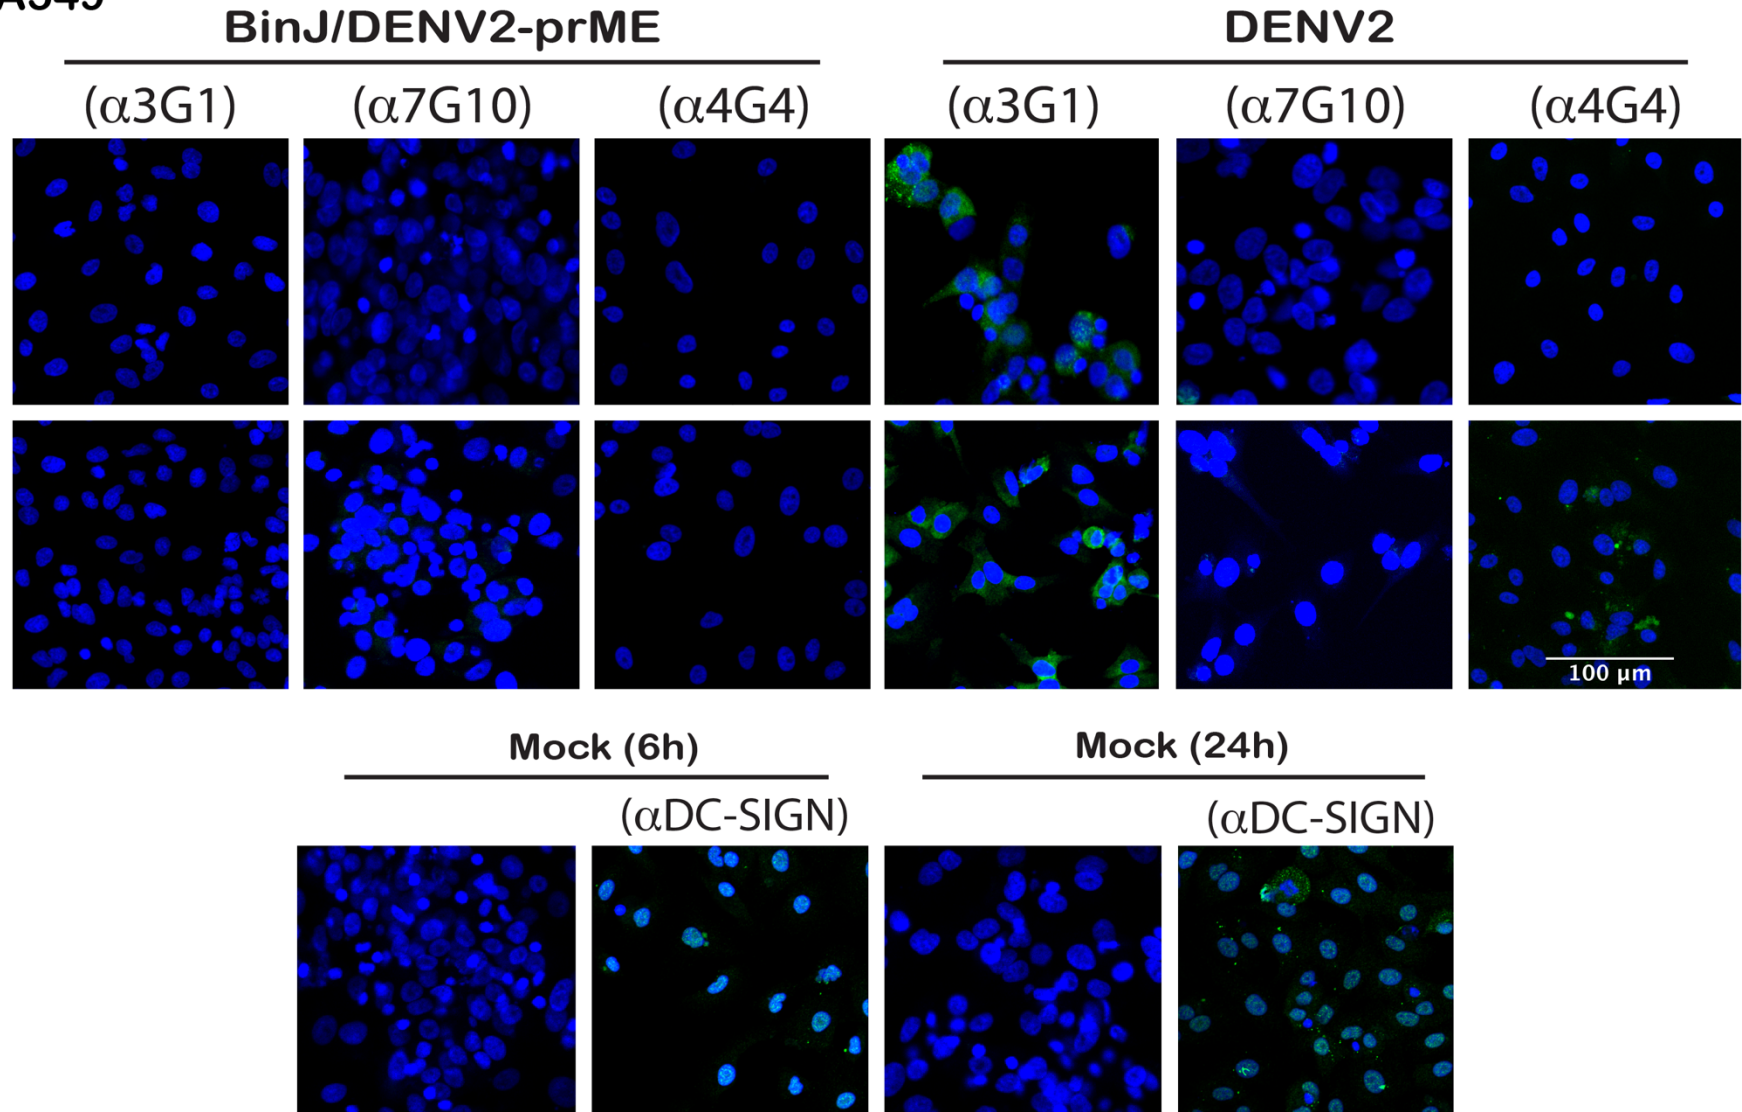

α3G1: dsRNA; α7G10: BinJV specific NS1; α4G4: pan-flavivirus NS1

4 **Supplementary Figure 2.** IFA analysis by confocal microscopy of BinJ/DENV2-prME and DENV2 infected C6/36 and mammalian cell lines. **(a)**  
5 C6/36, **(b)** K562 and **(c)** A549 cell lines were infected with BinJ/DENV2-prME or DENV2 (MOI: 1) and fixed 6 and 24 hours post infection. Viruses  
6 were stained with mAb 3G1 (dsRNA; green), 7G10 (BinJV specific NS1; green), 4G4 (pan-flavivirus NS1; green or magenta) and cell nuclei were  
7 stained with Hoechst 33342 (blue). Mock infected cells were immunolabelled with anti-DC-SIGN antibodies to confirm the absence/presence  
8 of DC-SIGN receptors (green).

9

(a)

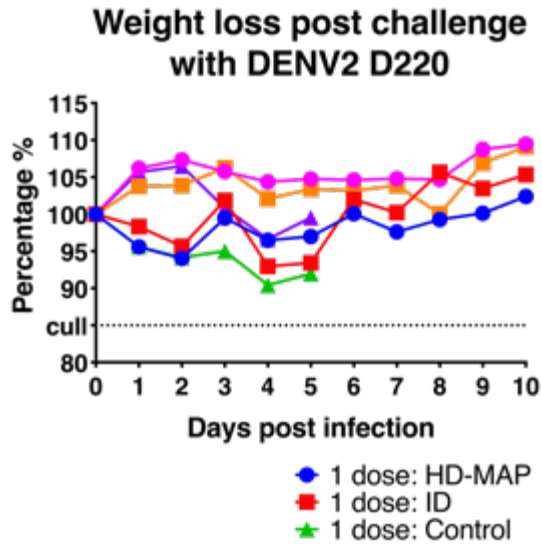

(b)

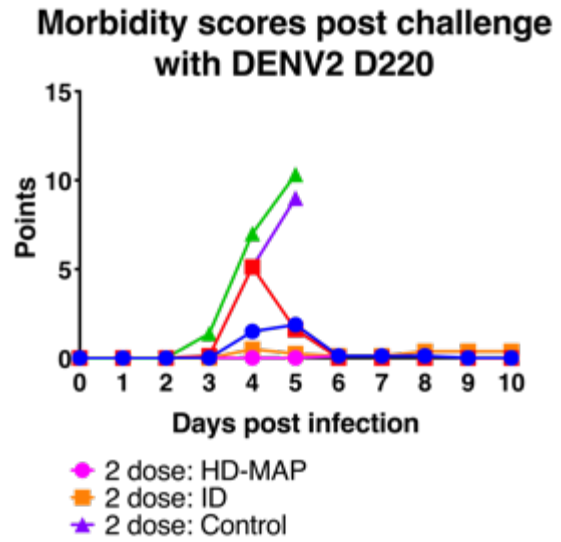

**Supplementary Figure 3.** Percentage weight loss and morbidity scores following virus challenge in HD-MAP study (with Fig. 6). **(a)** Mean percentage weight loss per group ( $n=8$ ) across 10 days post DENV2 D220 virus challenge. Dotted line represents 15% weight loss. **(b)** Mean morbidity scores per group ( $n=8$ ) across 10 days post DENV2 D220 virus challenge.



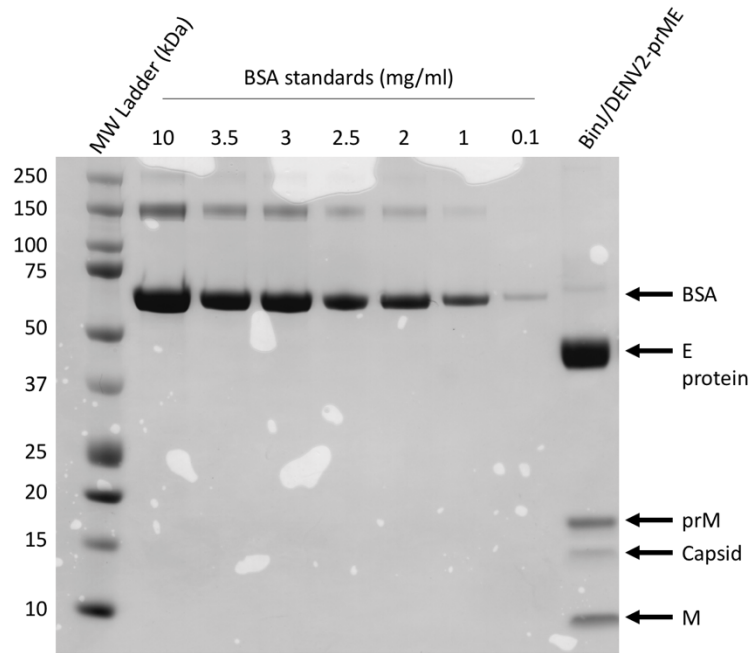

**Supplementary Figure 4.** SDS-PAGE (4 – 12%) analysis of gradient purified BinJ/DENV2-prME alongside BSA standards (0.1, 1, 2, 2.5, 3, 3.5 and 10 mg/mL). Flavivirus structural proteins (pre-membrane (prM), C , membrane (M) and envelope (E) protein) are indicated.
